# Supplementary material for: Chronic fatigue syndrome (CFS) or myalgic encephalomyelitis (ME) is different in children compared to in adults: a study of UK and Dutch clinical cohorts
Source: HighWire-hosted journal article supplement (doi:10.1136/bmjopen-2015-008830), 2015-10-01
Supplement: bmjopen-2015-008830supp.pdf [file bmjopen-2015-008830supp.pdf]

NHS specialist services for adults (n=27):

| <b>Service</b>                                                                 | <b>NHS Trust</b>                                     |
|--------------------------------------------------------------------------------|------------------------------------------------------|
| Southmead CFS/ME Service                                                       | North Bristol NHS Trust                              |
| Derbyshire CFS/ME Service                                                      | Derby Hospitals NHS Foundation Trust                 |
| Leeds & West Yorkshire CFS/ME Service                                          | Leeds & York Partnership NHS Foundation Trust        |
| CFS/ME Service at St Bartholomew's Hospital                                    | East London NHS Foundation Trust                     |
| Essex-wide CFS Service                                                         | Southend University Hospital NHS Foundation Trust    |
| St Helier & Sutton CFS/ME Service                                              | Epsom & St Helier University Hospitals NHS Trust     |
| Sussex-wide CFS/ME Service                                                     | Sussex Community NHS Trust                           |
| Lincolnshire CFS/ME Service                                                    | Lincolnshire Partnership NHS Foundation Trust        |
| Oxford University Hospitals CFS/ME Service                                     | Oxford University Hospitals NHS Trust                |
| Central & North West London Specialist Clinical Service for Adults with CFS/ME | Central and North West London NHS Foundation Trust   |
| South & West Devon CFS/ME Service                                              | Torbay & South Devon Health & Care NHS Trust         |
| Plymouth CFS/ME Service                                                        | Sentinel Healthcare Southwest CIC                    |
| Cornwall & Scilly Isles CFS/ME Service                                         | Royal Cornwall Hospitals NHS Trust                   |
| Leicestershire & Rutland CFS/ME Service                                        | Leicestershire Partnership NHS Trust                 |
| Oxfordshire CFS/ME Service                                                     | Oxford Health NHS Foundation Trust                   |
| North of Tyne CFS/ME Service                                                   | Newcastle upon Tyne Hospitals NHS Foundation Trust   |
| Tees Valley CFS/ME Service                                                     | South Tees Hospitals NHS Foundation Trust            |
| Royal Free CFS/ME Service                                                      | Royal Free London NHS Foundation Trust               |
| Kent and Medway CFS/ME Service                                                 | Kent & Medway NHS & Social Care Partnership Trust    |
| Dorset CFS/ME Service                                                          | Dorset HealthCare University NHS Foundation Trust    |
| East Manchester CFS/ME Service                                                 | Stockport NHS Foundation Trust                       |
| Lancashire CFS/ME Service                                                      | Lancashire Care NHS Foundation Trust                 |
| South Yorkshire & N Derbyshire CFS/ME Service                                  | Sheffield Health & Social Care NHS Foundation Trust  |
| Tameside & Glossop CFS/ME Service                                              | Stockport NHS Foundation Trust                       |
| Cambridgeshire & Peterborough CFS/ME Service                                   | Cambridgeshire Community Services NHS Trust          |
| Norfolk & Suffolk ME/CFS Service                                               | East Coast Community Healthcare CIC                  |
| Liverpool CFS/ME Service                                                       | The Royal Liverpool & Broadgreen Hospitals NHS Trust |

NHS specialist services for children and young people (n=8):

| <b>Service Name</b>                          | <b>Trust</b>                                       |
|----------------------------------------------|----------------------------------------------------|
| RNHRD                                        | RNHRD NHS Foundation Trust                         |
| Cornwall & Scilly Isles                      | Royal Cornwall Hospitals NHS Trust                 |
| Lincolnshire                                 | Lincolnshire Partnership NHS Foundation Trust      |
| Oxfordshire                                  | Oxford Health NHS Foundation Trust                 |
| North of Tyne                                | Newcastle upon Tyne Hospitals NHS Foundation Trust |
| GOSH                                         | GOSH for Children NHS Foundation Trust             |
| Cambridgeshire & Peterborough CFS/ME Service | Cambridgeshire Community Services NHS Trust        |
| Norfolk & Suffolk ME/CFS Service             | East Coast Community Healthcare CIC                |
